# Supplementary material for: Thromboelastography Parameters in Italian Pregnant Women: Do Antithrombotic Drugs Change Reference Values?
Source: HighWire-hosted journal article supplement (doi:10.1136/jim-2019-001261), 2020-01-30
Supplement: jim-2019-001261supp004_data_supplement.pdf [file jim-2019-001261supp004_data_supplement.pdf]

Supplemental Table 1 Main results of TEG assays

|                              | <b>T1 (n=10)</b> | <b>T2 (n=16)</b> | <b>T3 (n=18)</b> | <b>T4 (n=24)</b> |
|------------------------------|------------------|------------------|------------------|------------------|
| <b>R, min (2-8)</b>          | 5.5 (3.4-8.3)    | 5.2 (4.3-7.5)    | 6.5 (5.0-7.2)    | 5.8 (4.3-7.2)    |
| <b>K, min (1-3)</b>          | 1.4 (1.1-1.5)    | 1.1 (0.9-1.8)    | 1.2 (0.8-4.6)    | 1.1 (0.8-1.3)    |
| <b>Angle, degree (55-78)</b> | 69.3 (61.8-74.4) | 73.5 (65.3-73.6) | 71 (43.2-76.2)   | 73.6 (65-77.6)   |
| <b>MA, mm (51-69)</b>        | 67 (61.6-73.6)   | 69.4 (60.6-75.1) | 69.7 (64.7-76.8) | 71.1 (62.8-74.3) |
| <b>LY30 (%)</b>              | 1 (0-3.5)        | 0.2 (0-6.1)      | 0.1 (0-3.8)      | 0 (0-3.4)        |

R=reaction time, start of clotting factors activity; K=kinetics, rate of clot strengthening; Angle=slope of line between R and K, rate of clot strengthening; MA= maximum amplitude, contribution of platelets and fibrinogen; LY30= Lysis rate at 30 min. Values are provided as median and range.
