# Supplementary figures and images for: Thromboelastography Parameters in Italian Pregnant Women: Do Antithrombotic Drugs Change Reference Values?
Source: HighWire-hosted journal article supplement (doi:10.1136/jim-2019-001261), 2020-01-30

## Supplemental Graph 1

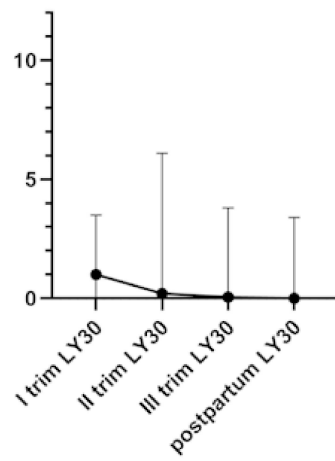

Supplement: jim-2019-001261supp001_data_supplement.pdf [file jim-2019-001261supp001_data_supplement.pdf]

### Supplemental Graph 2

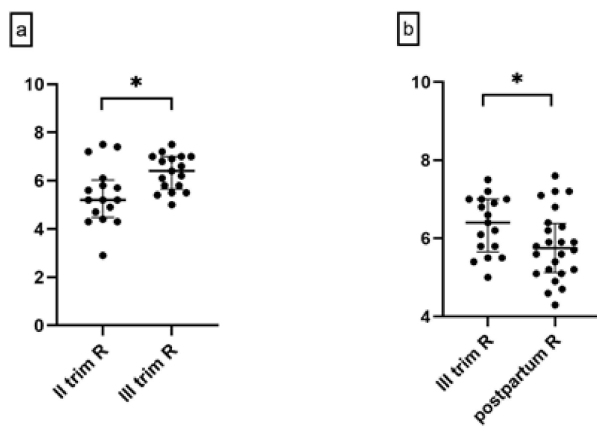

Supplement: jim-2019-001261supp002_data_supplement.pdf [file jim-2019-001261supp002_data_supplement.pdf]

## Supplemental Graph 3

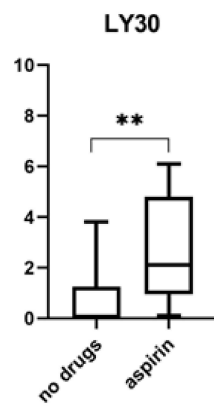

Supplement: jim-2019-001261supp003_data_supplement.pdf [file jim-2019-001261supp003_data_supplement.pdf]
